# Supplementary material for: Reduced MHC Class I and II Expression in HPV−Negative vs. HPV−Positive Cervical Cancers
Source: MDPI journal article supplement (doi:10.3390/cells11233911), 2022-12-03
Supplement: s1 [file s1]

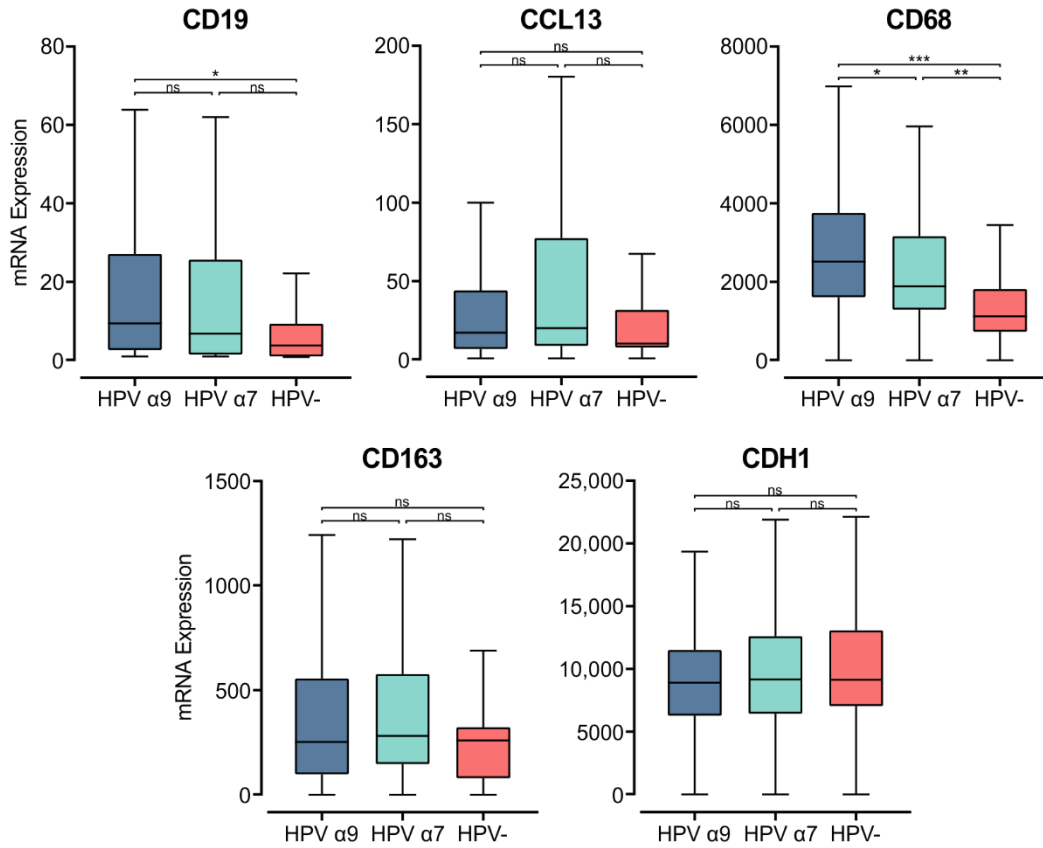

**Figure S1:** Expression of cell surface marker genes for APCs and epithelial cells in CC stratified by HPV+ ( $\alpha 9$  or  $\alpha 7$ ) and HPV- status. Normalized RNA-seq data for B cells, dendritic cells, macrophages, and epithelial cells were extracted from the CC cohort of the TCGA database. \*\*\*  $p \leq 0.001$ , \*\*  $p \leq 0.01$ , \*  $p = 0.05$ , ns (not significant).

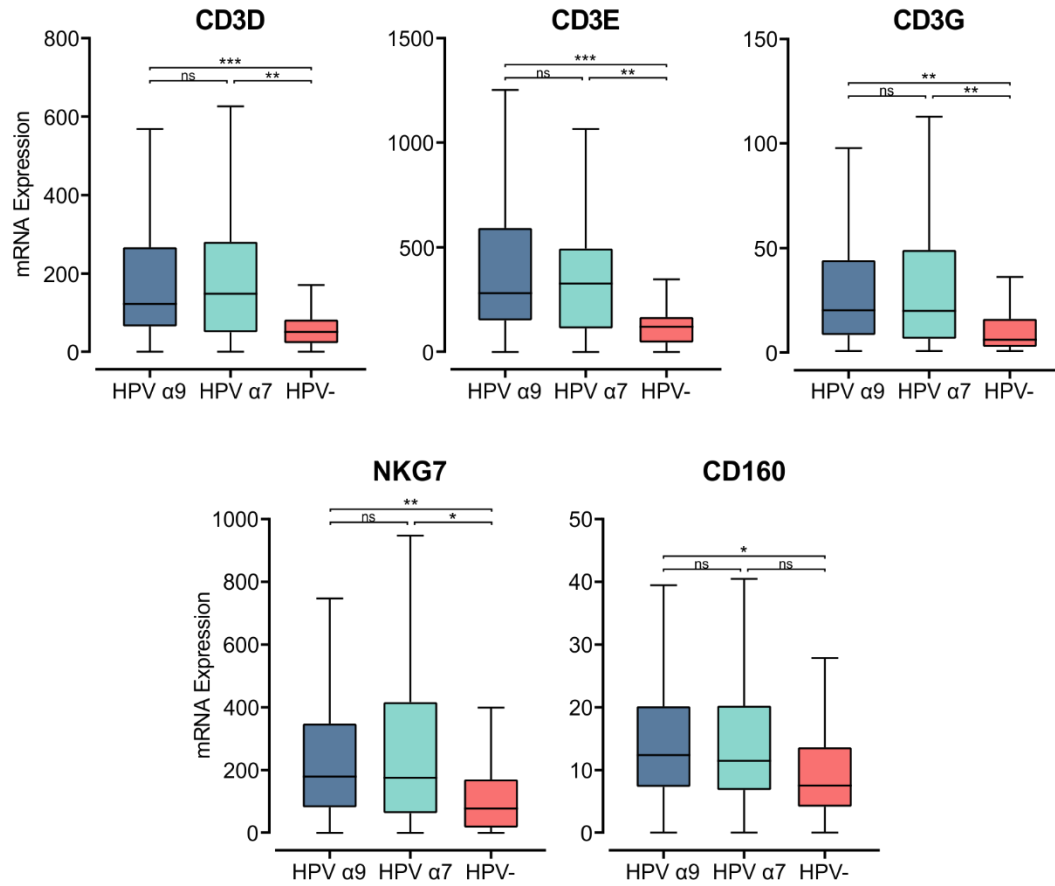

**Figure S2:** Expression of cell surface marker genes for IFN $\gamma$ -producing lymphocytes in CC stratified by HPV+ ( $\alpha$ 9 or  $\alpha$ 7) and HPV- status. Normalized RNA-seq data for T cells and NK cells were extracted from the CC cohort of the TCGA database. \*\*\*  $p \leq 0.001$ , \*\*  $p \leq 0.01$ , \*  $p = 0.05$ , ns (not significant).

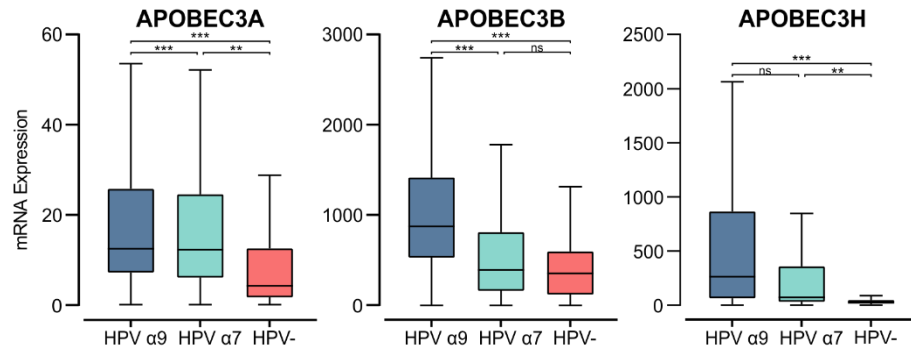

**Figure S3:** Expression of the *APOBEC 3A*, *3B*, and *3H* genes in CC, stratified by HPV+ ( $\alpha 9$  or  $\alpha 7$ ) and HPV- status. Normalized RNA-seq data for these genes were extracted from the CC cohort of the TCGA database. \*\*\*  $p \leq 0.001$ , \*\*  $p \leq 0.01$ , \*  $p = 0.05$ , ns (not significant).
