# Supplementary material for: Reduced MHC Class I and II Expression in HPV−Negative vs. HPV−Positive Cervical Cancers
Source: Cells. 2022 Dec 3;11(23):3911. doi: 10.3390/cells11233911 (PMC9741043; doi:10.3390/cells11233911)
Supplement: Supplementary file 1 [file cells-11-03911-s001.zip › Table S1_HPV Annotation of TCGA CESC Samples.xlsx]

## Sheet: Sheet1
Table S1: HPV Annotation of TCGA CESC Samples
Sample	HPV Type	HPV Species
TCGA-2W-A8YY	Negative	Negative
TCGA-4J-AA1J	HPV18	alpha-7
TCGA-BI-A0VR	HPV16	alpha-9
TCGA-BI-A0VS	HPV16	alpha-9
TCGA-BI-A20A	HPV16	alpha-9
TCGA-C5-A0TN	HPV16	alpha-9
TCGA-C5-A1BE	HPV16	alpha-9
TCGA-C5-A1BF	HPV18	alpha-7
TCGA-C5-A1BI	HPV16	alpha-9
TCGA-C5-A1BJ	HPV16	alpha-9
TCGA-C5-A1BK	HPV16	alpha-9
TCGA-C5-A1BL	HPV16	alpha-9
TCGA-C5-A1BM	HPV18	alpha-7
TCGA-C5-A1BN	HPV45	alpha-7
TCGA-C5-A1BQ	HPV31	alpha-9
TCGA-C5-A1M5	HPV33	alpha-9
TCGA-C5-A1M6	HPV18	alpha-7
TCGA-C5-A1M7	HPV18	alpha-7
TCGA-C5-A1M8	HPV16	alpha-9
TCGA-C5-A1M9	HPV16	alpha-9
TCGA-C5-A1ME	HPV18	alpha-7
TCGA-C5-A1MF	HPV45	alpha-7
TCGA-C5-A1MH	HPV16	alpha-9
TCGA-C5-A1MI	HPV18	alpha-7
TCGA-C5-A1MJ	HPV18	alpha-7
TCGA-C5-A1MK	HPV58	alpha-9
TCGA-C5-A1ML	HPV16	alpha-9
TCGA-C5-A1MN	HPV16	alpha-9
TCGA-C5-A1MP	HPV16	alpha-9
TCGA-C5-A2LS	HPV16	alpha-9
TCGA-C5-A2LT	HPV70	alpha-7
TCGA-C5-A2LV	HPV16	alpha-9
TCGA-C5-A2LX	HPV16	alpha-9
TCGA-C5-A2LY	HPV16	alpha-9
TCGA-C5-A2LZ	HPV16	alpha-9
TCGA-C5-A2M1	HPV16	alpha-9
TCGA-C5-A2M2	HPV16	alpha-9
TCGA-C5-A3HD	HPV16	alpha-9
TCGA-C5-A3HE	HPV18	alpha-7
TCGA-C5-A3HF	HPV18	alpha-7
TCGA-C5-A3HL	HPV16	alpha-9
TCGA-C5-A7CG	HPV52	alpha-9
TCGA-C5-A7CH	HPV16	alpha-9
TCGA-C5-A7CJ	HPV16	alpha-9
TCGA-C5-A7CK	HPV16	alpha-9
TCGA-C5-A7CL	HPV16	alpha-9
TCGA-C5-A7CM	HPV18	alpha-7
TCGA-C5-A7CO	HPV31	alpha-9
TCGA-C5-A7UC	HPV45	alpha-7
TCGA-C5-A7UE	HPV16	alpha-9
TCGA-C5-A7UH	HPV16	alpha-9
TCGA-C5-A7UI	HPV33	alpha-9
TCGA-C5-A7X3	HPV45	alpha-7
TCGA-C5-A7X5	HPV35	alpha-9
TCGA-C5-A7X8	HPV18	alpha-7
TCGA-C5-A7XC	HPV16	alpha-9
TCGA-C5-A8XH	HPV16	alpha-9
TCGA-C5-A8XI	HPV52	alpha-9
TCGA-C5-A8XJ	HPV33	alpha-9
TCGA-C5-A8XK	HPV16	alpha-9
TCGA-C5-A8YQ	Negative	Negative
TCGA-C5-A8YR	HPV45	alpha-7
TCGA-C5-A8YT	Negative	Negative
TCGA-C5-A8ZZ	HPV16	alpha-9
TCGA-C5-A901	HPV16	alpha-9
TCGA-C5-A902	HPV16	alpha-9
TCGA-C5-A905	HPV16	alpha-9
TCGA-C5-A907	HPV18	alpha-7
TCGA-DG-A2KH	HPV18	alpha-7
TCGA-DG-A2KJ	HPV18	alpha-7
TCGA-DG-A2KK	HPV16	alpha-9
TCGA-DG-A2KL	HPV16	alpha-9
TCGA-DG-A2KM	HPV16	alpha-9
TCGA-DR-A0ZL	HPV16	alpha-9
TCGA-DR-A0ZM	Negative	Negative
TCGA-DS-A0VK	HPV16	alpha-9
TCGA-DS-A0VL	HPV16	alpha-9
TCGA-DS-A0VM	HPV16	alpha-9
TCGA-DS-A0VN	HPV16	alpha-9
TCGA-DS-A3LQ	HPV69	Other
TCGA-DS-A5RQ	HPV16	alpha-9
TCGA-DS-A7WF	HPV16	alpha-9
TCGA-DS-A7WH	HPV16	alpha-9
TCGA-DS-A7WI	HPV16	alpha-9
TCGA-EA-A1QS	HPV39	alpha-7
TCGA-EA-A1QT	HPV16	alpha-9
TCGA-EA-A3HQ	HPV16	alpha-9
TCGA-EA-A3HR	HPV73	Other
TCGA-EA-A3HS	HPV16	alpha-9
TCGA-EA-A3HT	HPV16	alpha-9
TCGA-EA-A3HU	HPV16	alpha-9
TCGA-EA-A3QD	HPV16	alpha-9
TCGA-EA-A3QE	HPV16	alpha-9
TCGA-EA-A3Y4	HPV45	alpha-7
TCGA-EA-A410	Negative	Negative
TCGA-EA-A411	HPV16	alpha-9
TCGA-EA-A439	HPV18	alpha-7
TCGA-EA-A43B	HPV16	alpha-9
TCGA-EA-A44S	HPV16	alpha-9
TCGA-EA-A4BA	Negative	Negative
TCGA-EA-A50E	HPV16	alpha-9
TCGA-EA-A556	Negative	Negative
TCGA-EA-A5FO	HPV16	alpha-9
TCGA-EA-A5O9	HPV16	alpha-9
TCGA-EA-A5ZD	HPV58	alpha-9
TCGA-EA-A5ZE	HPV59	alpha-7
TCGA-EA-A5ZF	HPV18	alpha-7
TCGA-EA-A6QX	HPV58	alpha-9
TCGA-EA-A78R	HPV52	alpha-9
TCGA-EA-A97N	HPV16	alpha-9
TCGA-EK-A2GZ	HPV52	alpha-9
TCGA-EK-A2H0	HPV68	alpha-7
TCGA-EK-A2H1	HPV16	alpha-9
TCGA-EK-A2IP	HPV16	alpha-9
TCGA-EK-A2PG	HPV58	alpha-9
TCGA-EK-A2PI	HPV16	alpha-9
TCGA-EK-A2PK	HPV18	alpha-7
TCGA-EK-A2PL	HPV39	alpha-7
TCGA-EK-A2PM	Negative	Negative
TCGA-EK-A2R7	HPV18	alpha-7
TCGA-EK-A2R8	HPV45	alpha-7
TCGA-EK-A2R9	HPV33	alpha-9
TCGA-EK-A2RA	HPV52	alpha-9
TCGA-EK-A2RB	HPV16	alpha-9
TCGA-EK-A2RC	HPV16	alpha-9
TCGA-EK-A2RE	HPV16	alpha-9
TCGA-EK-A2RJ	HPV59	alpha-7
TCGA-EK-A2RK	HPV16	alpha-9
TCGA-EK-A2RL	HPV16	alpha-9
TCGA-EK-A2RM	HPV18	alpha-7
TCGA-EK-A2RN	HPV16	alpha-9
TCGA-EK-A2RO	HPV16	alpha-9
TCGA-EK-A3GJ	HPV58	alpha-9
TCGA-EK-A3GK	HPV16	alpha-9
TCGA-EK-A3GM	HPV45	alpha-7
TCGA-EK-A3GN	HPV16	alpha-9
TCGA-EX-A1H5	HPV16	alpha-9
TCGA-EX-A1H6	HPV16	alpha-9
TCGA-EX-A3L1	HPV45	alpha-7
TCGA-EX-A449	HPV16	alpha-9
TCGA-EX-A69L	HPV16	alpha-9
TCGA-EX-A69M	HPV52	alpha-9
TCGA-EX-A8YF	HPV18	alpha-7
TCGA-FU-A23K	HPV18	alpha-7
TCGA-FU-A23L	HPV45	alpha-7
TCGA-FU-A2QG	HPV16	alpha-9
TCGA-FU-A3EO	HPV16	alpha-9
TCGA-FU-A3HY	HPV16	alpha-9
TCGA-FU-A3HZ	Negative	Negative
TCGA-FU-A3NI	HPV16	alpha-9
TCGA-FU-A3TQ	HPV16	alpha-9
TCGA-FU-A3TX	HPV18	alpha-7
TCGA-FU-A3WB	HPV16	alpha-9
TCGA-FU-A3YQ	HPV16	alpha-9
TCGA-FU-A40J	HPV16	alpha-9
TCGA-FU-A57G	Negative	Negative
TCGA-FU-A5XV	HPV18	alpha-7
TCGA-FU-A770	HPV16	alpha-9
TCGA-GH-A9DA	HPV45	alpha-7
TCGA-HG-A2PA	HPV16	alpha-9
TCGA-HM-A3JJ	HPV16	alpha-9
TCGA-HM-A3JK	HPV35	alpha-9
TCGA-HM-A4S6	HPV16	alpha-9
TCGA-HM-A6W2	Negative	Negative
TCGA-IR-A3L7	HPV18	alpha-7
TCGA-IR-A3LA	Negative	Negative
TCGA-IR-A3LB	HPV45	alpha-7
TCGA-IR-A3LC	HPV16	alpha-9
TCGA-IR-A3LF	HPV16	alpha-9
TCGA-IR-A3LH	HPV45	alpha-7
TCGA-IR-A3LI	HPV16	alpha-9
TCGA-IR-A3LK	HPV31	alpha-9
TCGA-IR-A3LL	HPV16	alpha-9
TCGA-JW-A5VG	HPV59	alpha-7
TCGA-JW-A5VH	Negative	Negative
TCGA-JW-A5VI	HPV30	Other
TCGA-JW-A5VJ	HPV18	alpha-7
TCGA-JW-A5VK	HPV16	alpha-9
TCGA-JW-A5VL	HPV16	alpha-9
TCGA-JW-A69B	HPV16	alpha-9
TCGA-JW-A852	HPV16	alpha-9
TCGA-JW-AAVH	HPV16	alpha-9
TCGA-JX-A3PZ	HPV45	alpha-7
TCGA-JX-A3Q0	HPV31	alpha-9
TCGA-JX-A3Q8	HPV16	alpha-9
TCGA-JX-A5QV	HPV16	alpha-9
TCGA-LP-A4AU	HPV18	alpha-7
TCGA-LP-A4AV	HPV56	Other
TCGA-LP-A4AW	HPV16	alpha-9
TCGA-LP-A4AX	HPV16	alpha-9
TCGA-LP-A5U2	HPV16	alpha-9
TCGA-LP-A5U3	HPV16	alpha-9
TCGA-LP-A7HU	HPV16	alpha-9
TCGA-MA-AA3W	HPV16	alpha-9
TCGA-MA-AA3X	HPV16	alpha-9
TCGA-MA-AA3Y	HPV39	alpha-7
TCGA-MA-AA3Z	HPV16	alpha-9
TCGA-MA-AA41	HPV16	alpha-9
TCGA-MA-AA42	HPV16	alpha-9
TCGA-MA-AA43	HPV18	alpha-7
TCGA-MU-A51Y	HPV16	alpha-9
TCGA-MU-A5YI	HPV16	alpha-9
TCGA-MU-A8JM	HPV16	alpha-9
TCGA-MY-A5BD	HPV16	alpha-9
TCGA-MY-A5BE	HPV16	alpha-9
TCGA-MY-A5BF	HPV16	alpha-9
TCGA-MY-A913	HPV45	alpha-7
TCGA-PN-A8MA	HPV16	alpha-9
TCGA-Q1-A5R1	HPV16	alpha-9
TCGA-Q1-A5R2	HPV16	alpha-9
TCGA-Q1-A5R3	HPV18	alpha-7
TCGA-Q1-A6DT	HPV16	alpha-9
TCGA-Q1-A6DV	HPV16	alpha-9
TCGA-Q1-A6DW	HPV16	alpha-9
TCGA-Q1-A73O	HPV18	alpha-7
TCGA-Q1-A73P	HPV18	alpha-7
TCGA-Q1-A73Q	HPV33	alpha-9
TCGA-Q1-A73R	HPV16	alpha-9
TCGA-Q1-A73S	HPV18	alpha-7
TCGA-R2-A69V	HPV39	alpha-7
TCGA-RA-A741	HPV16	alpha-9
TCGA-UC-A7PD	HPV16	alpha-9
TCGA-UC-A7PF	HPV16	alpha-9
TCGA-UC-A7PG	HPV16	alpha-9
TCGA-UC-A7PI	HPV18	alpha-7
TCGA-VS-A8EB	HPV16	alpha-9
TCGA-VS-A8EC	HPV16	alpha-9
TCGA-VS-A8EG	HPV16	alpha-9
TCGA-VS-A8EH	HPV16	alpha-9
TCGA-VS-A8EI	HPV16	alpha-9
TCGA-VS-A8EJ	Negative	Negative
TCGA-VS-A8EK	HPV35	alpha-9
TCGA-VS-A8EL	HPV31	alpha-9
TCGA-VS-A8Q8	HPV16	alpha-9
TCGA-VS-A8Q9	HPV51	Other
TCGA-VS-A8QA	HPV16	alpha-9
TCGA-VS-A8QC	HPV16	alpha-9
TCGA-VS-A8QF	HPV16	alpha-9
TCGA-VS-A8QH	Negative	Negative
TCGA-VS-A8QM	HPV16	alpha-9
TCGA-VS-A94W	HPV16	alpha-9
TCGA-VS-A94X	HPV45	alpha-7
TCGA-VS-A94Y	HPV45	alpha-7
TCGA-VS-A94Z	HPV16	alpha-9
TCGA-VS-A950	HPV35	alpha-9
TCGA-VS-A952	HPV16	alpha-9
TCGA-VS-A953	HPV16	alpha-9
TCGA-VS-A954	HPV35	alpha-9
TCGA-VS-A957	HPV33	alpha-9
TCGA-VS-A958	HPV39	alpha-7
TCGA-VS-A959	HPV31	alpha-9
TCGA-VS-A9U5	HPV16	alpha-9
TCGA-VS-A9U6	HPV33	alpha-9
TCGA-VS-A9U7	HPV16	alpha-9
TCGA-VS-A9UB	HPV45	alpha-7
TCGA-VS-A9UC	HPV33	alpha-9
TCGA-VS-A9UD	HPV16	alpha-9
TCGA-VS-A9UH	HPV45	alpha-7
TCGA-VS-A9UI	HPV52	alpha-9
TCGA-VS-A9UJ	Negative	Negative
TCGA-VS-A9UL	HPV18	alpha-7
TCGA-VS-A9UM	HPV16	alpha-9
TCGA-VS-A9UO	HPV18	alpha-7
TCGA-VS-A9UP	HPV18	alpha-7
TCGA-VS-A9UQ	HPV16	alpha-9
TCGA-VS-A9UR	HPV16	alpha-9
TCGA-VS-A9UT	Negative	Negative
TCGA-VS-A9UU	HPV16	alpha-9
TCGA-VS-A9UV	HPV52	alpha-9
TCGA-VS-A9UY	HPV16	alpha-9
TCGA-VS-A9UZ	HPV16	alpha-9
TCGA-VS-A9V0	Negative	Negative
TCGA-VS-A9V1	HPV45	alpha-7
TCGA-VS-A9V2	HPV16	alpha-9
TCGA-VS-A9V3	HPV58	alpha-9
TCGA-VS-A9V4	Negative	Negative
TCGA-VS-A9V5	HPV16	alpha-9
TCGA-VS-AA62	HPV45	alpha-7
TCGA-WL-A834	HPV16	alpha-9
TCGA-XS-A8TJ	HPV16	alpha-9
TCGA-ZJ-A8QO	HPV33	alpha-9
TCGA-ZJ-A8QQ	HPV68	alpha-7
TCGA-ZJ-A8QR	HPV16	alpha-9
TCGA-ZJ-AAX4	HPV16	alpha-9
TCGA-ZJ-AAX8	HPV18	alpha-7
TCGA-ZJ-AAXA	HPV16	alpha-9
TCGA-ZJ-AAXB	HPV18	alpha-7
TCGA-ZJ-AAXD	HPV16	alpha-9
TCGA-ZJ-AAXF	HPV16	alpha-9
TCGA-ZJ-AAXI	HPV16	alpha-9
TCGA-ZJ-AAXJ	HPV16	alpha-9
TCGA-ZJ-AAXN	HPV45	alpha-7
TCGA-ZJ-AAXT	HPV18	alpha-7
TCGA-ZJ-AAXU	HPV16	alpha-9
TCGA-ZJ-AB0H	HPV18	alpha-7
TCGA-ZJ-AB0I	HPV16	alpha-9
TCGA-ZX-AA5X	HPV35	alpha-9
